# Supplementary material for: Salivary microbial changes during the first 6 months of orthodontic treatment
Source: PubMed Central journal article supplement (PMC7718796; doi:10.7717/peerj.10446), 2020-12-01
Supplement: peerj-08-10446-s003.pdf [file peerj-08-10446-s003.pdf]

Table S1-1 Relative abundances of OTUs

|               | OTU ID and taxa               | Relative abundance (%) |
|---------------|-------------------------------|------------------------|
| T0 unique (6) | OTU046: S24-7                 | 0.0025                 |
|               | OTU146: Alphaproteobacteria   | 0.0014                 |
|               | OTU158: Peptostreptococcaceae | 0.0004                 |
|               | OTU164: S24-7                 | 0.0004                 |
|               | OTU187: Tissierellaceae       | 0.0004                 |
|               | OTU188: Moryella              | 0.0005                 |
| T1 unique (0) | none                          | 0                      |
| T2 unique (1) | OTU011: Coriobacteriaceae     | 0.0011                 |
| T0 & T1 (8)   | OTU121: Treponema             | 0.0012                 |
|               | OTU127: TM7-3                 | 0.0007                 |
|               | OTU152: Lactobacillus         | 0.0005                 |
|               | OTU184: SHD-231               | 0.0006                 |
|               | OTU217: Oribacterium          | 0.0003                 |
|               | OTU247: Lactococcus           | 0.0003                 |
|               | OTU291: Acidovorax            | 0.0003                 |
|               | OTU292: Mogibacteriaceae      | 0.0004                 |
| T1 & T2 (4)   | OTU137: Moraxella             | 0.0009                 |
|               | OTU179: Alloscardovia         | 0.0003                 |
|               | OTU283: Prevotella            | 0.0004                 |
|               | OTU338: Veillonellaceae       | 0.0004                 |
| T0 & T2 (6)   | OTU061: Leptotrichia          | 0.0035                 |
|               | OTU125: Acholeplasma          | 0.0014                 |
|               | OTU135: Corynebacterium       | 0.0014                 |
|               | OTU168: Treponema             | 0.0012                 |
|               | OTU195: Syntrophomonas        | 0.0004                 |
|               | OTU204: Unclassified          | 0.0005                 |
