# Supplementary material for: Salivary microbial changes during the first 6 months of orthodontic treatment
Source: PubMed Central journal article supplement (PMC7718796; doi:10.7717/peerj.10446), 2020-12-01
Supplement: peerj-08-10446-s004.pdf [file peerj-08-10446-s004.pdf]

Table S1-2 Information of core microbiome

| OTU ID and taxa             | Relative abundance (%) |
|-----------------------------|------------------------|
| OTU278: Neisseria           | 9.4677                 |
| OTU368: Prevotella          | 9.3423                 |
| OTU192: Streptococcus       | 6.8236                 |
| OTU238: Haemophilus         | 5.4626                 |
| OTU321: Veillonella         | 4.7226                 |
| OTU389: Rothia              | 3.4661                 |
| OTU013: Fusobacterium       | 2.8501                 |
| OTU342: Veillonella         | 1.6545                 |
| OTU214: Prevotella          | 0.7239                 |
| OTU104: Prevotella          | 0.7057                 |
| OTU249: Granulicatella      | 0.6802                 |
| OTU272: Haemophilus         | 0.6186                 |
| OTU310: Actinomyces         | 0.5346                 |
| OTU038: Rothia              | 0.4988                 |
| OTU170: Campylobacter       | 0.4595                 |
| OTU200: Gemellaceae         | 0.3356                 |
| OTU113: Lautropia           | 0.3352                 |
| OTU293: Atopobium           | 0.2225                 |
| OTU408: Selenomonas         | 0.2202                 |
| OTU154: Lachnoanaerobaculum | 0.1876                 |
| OTU351: Oribacterium        | 0.1687                 |
| OTU253: Peptostreptococcus  | 0.1530                 |
| OTU329: Mogibacteriaceae    | 0.1480                 |
| OTU177: Leptotrichia        | 0.1228                 |
| OTU385: Catonella           | 0.0721                 |
| OTU287: Fusobacterium       | 0.0654                 |
