# Supplementary material for: Salivary microbial changes during the first 6 months of orthodontic treatment
Source: PubMed Central journal article supplement (PMC7718796; doi:10.7717/peerj.10446), 2020-12-01
Supplement: peerj-08-10446-s005.pdf [file peerj-08-10446-s005.pdf]

Table S2-1 Information of hub nodes (T0)

| OTU ID and taxa              | Relative abundance (%) |
|------------------------------|------------------------|
| OTU028: Prevotella           | 0.0286                 |
| OTU030: Actinomyces          | 0.0099                 |
| OTU041: Capnocytophaga       | 0.0080                 |
| OTU047: Capnocytophaga       | 0.0812                 |
| OTU053: Prevotella           | 0.0153                 |
| OTU057: Leptotrichia         | 0.0203                 |
| OTU069: Peptostreptococaceae | 0.0241                 |
| OTU074: Aggregatibacter      | 0.1406                 |
| OTU120: Leptotrichia         | 0.0758                 |
| OTU126: Prevotella           | 0.0043                 |
| OTU143: Corynebacterium      | 0.2575                 |
| OTU169: Aggregatibacter      | 0.1500                 |
| OTU221: Enterobacteriaceae   | 0.0415                 |
| OTU233: Neisseria            | 0.0255                 |
| OTU240: Leptotrichia         | 0.0086                 |
| OTU264: Veillonella          | 0.0684                 |
| OTU272: Haemophilus          | 0.6663                 |
| OTU286: Neisseriaceae        | 0.1457                 |
| OTU295: Enterobacteriaceae   | 0.0126                 |
| OTU309: Neisseria            | 0.0070                 |
| OTU311: Enterobacteriaceae   | 0.0186                 |
| OTU316: Prevotella           | 0.0279                 |
| OTU323: Treponema            | 0.0144                 |
| OTU326: Enterobacteriaceae   | 1.4293                 |
| OTU339: Leptotrichia         | 0.0756                 |
| OTU341: Enterobacteriaceae   | 0.0177                 |
| OTU360: Capnocytophaga       | 0.0483                 |
| OTU363: Leptotrichia         | 0.1112                 |
| OTU379: Leptotrichia         | 0.1011                 |
| OTU388: Paludibacter         | 0.0413                 |
