# Supplementary material for: Salivary microbial changes during the first 6 months of orthodontic treatment
Source: PubMed Central journal article supplement (PMC7718796; doi:10.7717/peerj.10446), 2020-12-01
Supplement: peerj-08-10446-s006.pdf [file peerj-08-10446-s006.pdf]

Table S2-2 Information of hub nodes (T1)

| <u>OTU ID and taxa</u>   | <u>Relative abundance (%)</u> |
|--------------------------|-------------------------------|
| OTU003: Selenomonas      | 0.1574                        |
| OTU019: Prevotella       | 0.0980                        |
| OTU022: Mogibacteriaceae | 0.0144                        |
| OTU028: Prevotella       | 0.0505                        |
| OTU029: Rs-045           | 0.0322                        |
| OTU030: Actinomyces      | 0.0187                        |
| OTU031: Treponema        | 0.0179                        |
| OTU050: Treponema        | 0.0331                        |
| OTU058: Schwartzia       | 0.0322                        |
| OTU101: Treponema        | 0.0085                        |
| OTU126: Prevotella       | 0.0097                        |
| OTU143: Corynebacterium  | 0.3470                        |
| OTU169: Aggregatibacter  | 0.1286                        |
| OTU240: Leptotrichia     | 0.0154                        |
| OTU251: Leptotrichia     | 0.1061                        |
| OTU259: Prevotella       | 0.0888                        |
| OTU275: Prevotella       | 0.3377                        |
| OTU279: Prevotella       | 0.1557                        |
| OTU287: Fusobacterium    | 0.0667                        |
| OTU316: Prevotella       | 0.0452                        |
| OTU323: Treponema        | 0.0157                        |
| OTU336: Prevotella       | 0.2215                        |
| OTU347: Weeksellaceae    | 0.0096                        |
| OTU358: Atopobium        | 0.0254                        |
| OTU363: Leptotrichia     | 0.2135                        |
| OTU379: Leptotrichia     | 0.1289                        |
| OTU390: TM7-3            | 0.0590                        |
| OTU401: Leptotrichia     | 0.1980                        |
| OTU405: Megashaera       | 0.0683                        |
| OTU408: Selenomonas      | 0.3054                        |
