# Supplementary material for: Salivary microbial changes during the first 6 months of orthodontic treatment
Source: PubMed Central journal article supplement (PMC7718796; doi:10.7717/peerj.10446), 2020-12-01
Supplement: peerj-08-10446-s007.pdf [file peerj-08-10446-s007.pdf]

Table S2-3 Information of hub nodes (T2)

| OTU ID and taxa            | Relative abundance (%) |
|----------------------------|------------------------|
| OTU018: Oribacterium       | 0.0996                 |
| OTU027: Moryella           | 0.0367                 |
| OTU048: Mogibacterium      | 0.0159                 |
| OTU096: Selenomonas        | 0.6662                 |
| OTU118: Prevotella         | 0.6066                 |
| OTU162: Lachnonaerobaculum | 0.1908                 |
| OTU186: Megasphaera        | 0.5214                 |
| OTU194: Prevotella         | 0.3762                 |
| OTU201: Prevotella         | 0.1002                 |
| OTU209: Prevotella         | 0.1499                 |
| OTU214: Prevoella          | 0.6329                 |
| OTU239: Prevotella         | 0.2639                 |
| OTU250: Veillonella        | 0.2178                 |
| OTU257: Leptotrichia       | 0.2600                 |
| OTU259: Prevotella         | 0.0264                 |
| OTU260: Prevotella         | 0.1372                 |
| OTU271: Prevotella         | 0.0043                 |
| OTU284: Prevotella         | 0.0574                 |
| OTU293: Atopobium          | 0.2200                 |
| OTU321: Veillonella        | 5.0982                 |
| OTU325: Prevotella         | 0.0471                 |
| OTU329: Mogibacteriaceae   | 0.1118                 |
| OTU335: Prevotella         | 0.0235                 |
| OTU340: Bulleidia          | 0.1850                 |
| OTU343: Prevotella         | 0.0084                 |
| OTU368: Prevotella         | 7.5719                 |
| OTU374: Prevotella         | 0.0055                 |
| OTU376: Prevotella         | 0.0141                 |
| OTU392: Clostridiales      | 0.0850                 |
